# Supplementary material for: A genotype-to-phenotype map of in vitro selected RNA-cleaving DNAzymes: implications for accessing the target phenotype
Source: PubMed Central journal article supplement — Nucleic Acids Res. 2009 Apr 8;37(11):3545–57. doi: 10.1093/nar/gkp222 (PMC2699508; doi:10.1093/nar/gkp222), 2009-04-08
Supplement: gkp222_1.pdf [file gkp222_1.pdf]

## Supplementary Online Data for

### **A genotype-to-phenotype map of *in vitro* selected RNA-cleaving DNazymes: Implications for accessing the target phenotype**

Kenny Schlosser<sup>1</sup>, Jeffrey C.F. Lam<sup>1</sup> and Yingfu Li<sup>1,2\*</sup>

*Department of Biochemistry and Biomedical Sciences<sup>1</sup> and Department of Chemistry<sup>2</sup>,  
McMaster University, Hamilton, Ontario, Canada L8N 3Z5*

\* Corresponding Author:

1200 Main Street West

Hamilton, Ontario

Canada L8N 3Z5

Tel: 905-525-9140 ext. 22462

Fax: 905-522-9033

Email: [liying@mcmaster.ca](mailto:liying@mcmaster.ca)

### Initial Selection Experiment (G0-G7)

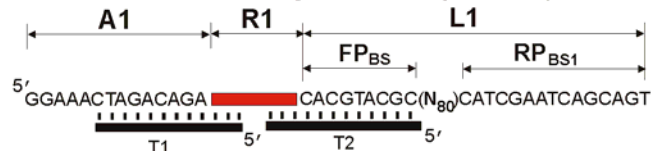

### Selection Experiment A (G8-G24)

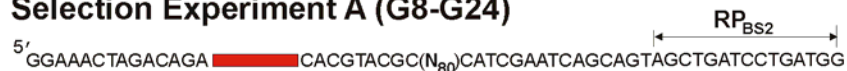

### Selection Experiment B (G8-G30)

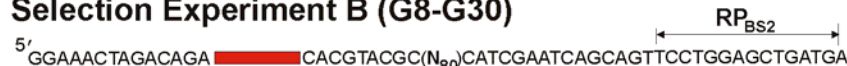

#### RNA substrate (5'-3')

R1 = GGAGAGAGAUGGGUGCGUUACGUAAACUUACAUCUACGAAUCAGGUUCGA

#### Ligation Splints (5'-3')

T1 = TCTCTCTCTCTGTCTAG

T2 = GCGTACGTGTGCAACCTGA

#### PCR primers (5'-3')

##### Forward

P1 = TTACATCTACGAATCAGGTTCGACACGTACGC (G0-G30)

P3 = TTACATCTACGAATCAGGTTCGAr (G0-G30)

##### Reverse

P2 = ACTGCTGATTGATG (G0-G8 PCR1)

P2 = CCATCAGGATCAGCTACTGCTGATTGATG (Exp A: G8 PCR2)

P2 = CCATCAGGATCAGCT (Exp A: G9-G24)

P2 = TCATCAGCTCCAGGAACTGCTGATTGATG (Exp B: G8 PCR2)

P2 = TCATCAGCTCCAGGA (Exp B: G9-G30)

**Figure S1 Library Design and Relevant Sequences.** Each molecule in the initial library contains three key domains: a 14-nt DNA fragment (denoted A1) precedes a 50-nt RNA fragment (denoted R1), which in turn precedes another 104-nt DNA fragment (denoted L1). L1 contains 80 random-sequence nucleotides (N<sub>80</sub>, where N = A, G, C or T) that serve as the putative catalytic domain and provides the initial sequence diversity. The N<sub>80</sub> region is flanked by a 9-nt forward primer binding site (FP<sub>BS</sub>) and a 15-nt reverse primer binding site (RP<sub>BS1</sub>), which are used for PCR amplification. Different reverse primer binding sites (RP<sub>BS2</sub>) and corresponding P2 primers, were used in experiment A and B to minimize cross-contamination of the amplifying DNA species. The A1, R1, and L1 fragments are ligated by T4 DNA ligase in the presence of ligation splints T1 and T2. Sequences denoted by P1, P2, and P3 serve as primers during PCR (Ar = adenine ribonucleotide).

|              |                                                                                                                            |
|--------------|----------------------------------------------------------------------------------------------------------------------------|
| E18-G15-C1A  | CACGTACGCATTTCCAGCGGATCGATTCTCTTTCCCGTCGTAGGTATGACCAGGGAAGAATAGGTGGACATAAATTGATGGTGTCTGGGCATCGAATCAGTAGTAGCTGATCCTGATGG    |
| E18-G15-C6A  | CACGTACGCAC TTCCAGCGGATCGATTCTCTTTCCCGTCGTGGGTATGACCAGGGAAGAATGGGTGGACACAAATTGATGGTGTCTGGGCGTCGAATCAACAGTAGCTGATCCTGATGG   |
| E18-G21A     | CACGTACGCAC TTCCAGCGGATCGATTCTCTTTCCCGTCGCGGGTATGACCAGGGAAGAATGGGTGGACACAGATTGATGGTGTGGGCATCGAATTGGTGGTAGCTGATCCTGATGG     |
| E88-G24A     | CACGTACGCAC TTCCAGCGGATCGAAATCTCTCTTTGACGCTGGACTCGGAGGCCCTGCTTCCACCAGTAGGGGGTTTGTTCAGGGTGGTATCGAATCGGTAGTAGCTGATCCTGATGG   |
| E25-G15A     | CACGTACGCTACTCTCAGTGAGGCGAAATCTTCTCTCTGCGGGGAACAATCGGGGGCGCAGTGATCAAGGGTGGAAATGGGGATGGGTGCATCGAATTAGCAGTAGCTGATCCTGATGG    |
| E25-G24A     | CACGTACGCAC TTGTCAGCGGACTCGAAATCTTCTCTCTGCGGGGAACAAGTTGGGGGCGCAGTGATCAAGGGTGGAAATGGGGATGGGTGCATCGAATTGGCAGTAGCTGATCCTGATGG |
| E75-G15A     | CACGTACGCAC TTGCCAGCGGCGGAGGCTCTTGATCGGGCGCAGGAGGGGACCGGTGATATCGGCATCCTCGATGTTAGACTGGATGGTGCATCGAATTAGCAGTAGCTGATCCTGATGG  |
| E75-G21A     | CACGTACGCAC TTGTCAGTGACGCGAGGCTCTTGATCGGGCGCAGGAGGGGACCGGTGATACCGGCATCCTTGATGTTAGGCTGGATGGGTATCGAATTGGCATAGCTGATCCTGATGG   |
| E78-G18A     | CACGTACGCAC TTCCAGCGGATCGATTCTCACCTGTGGCGTATTATCGTTGGATGATGGTGGTGGGCGGAGGCTTTTCGTACATTGGACATTGAATCGGCAGTAGCTGATCCTGATGG    |
| E42-G15-C16A | CACGTACGCAC TTCCAGCGGATCGAAATCTTGAACGCAGTAGGTCTCGGGTGTGGCGGTGAGTTGGCGTAGGCCATGCCTTCCGCTGGCATCGAATCATCAGTAGCTGATCCTGATGG    |
| E42-G15-C24A | CACGTACGCAC TTCCAGCGGATCGAAATCTCGAACGCAGTTAGGTCTCGGGTGTGGCGGTGAGTTGGCGTAGGCCATGTCCTTCCGCTGGCATCGAATTAGCAGTAGCTGATCCTGATGG  |
| E14-G10A     | CACGTACGCAC TTGCTAGCAGCCGAAATCTGCTCTCCCAATATGGTCTTCCGGGAAGACGGTAATAGGAGAAATGGTGCCTTGTCCGTGCATCGAATCAGTAGTAGCTGATCCTGATGG   |
| E14-G15A     | CACGTACGCAC TTGCTAGCAGCTCGAAATCGCTCTCAATATGGCTTTCGGGAAGACGGTAATAGGAGAAATGGTGCCTTGTCCGTGCATTGAATCAGCAGTAGCTGATCCTGATGG      |
| E14-G24A     | CACGTACGCAC TTGCTAGCAGCTCGAAATCGCTCTCCCAATGTGGCTTTCGGGGAAGACGGTAATAGGAGAAATGGTGCCTTGTCCGTGCATTGAATCAGCAGTAGCTGATCCTGATGG   |
| E74-G15-C30A | CACGTACGCAC TTCAATAGCAGCGTTAACAAAAAGTTTCGAGAAAGCGAATCATCTAACGGTGGTACTCCATTGGTTTTTTGGGTGGGCATCGAATTAGCAGTAGCTGATCCTGATGG    |
| E74-G15-C33A | CACGTACGCAC TTCAATAGCAGCGCTAACAAAAAGTTTCGAGAAAGCGAATCATCTAACAGTGGTACTCCATTGGTCTTTTGGGTGGGCATCGAATTAGCAGTAGCTGATCCTGATGG    |
| E76-G15A     | CACGTACGCAC TTGCCAGTGGCGGAATTCTCTGGGAGATCTGTATAGGGTTGCTGCGAGTTGACAGGGATGGTGTGCAGTTTGTGTGGCATCGAATCAACAGTAGCTGATCCTGATGG    |
| E23-G15A     | CACGTACGCAC TTGCCAGCGGCGGATTCAGTGTGCGGAGACTAGTTGTTGCCTTCGGCTTGGAGGACAAAAC TTTTGTATAGCGTGGGCATGAATCAGTAGTAGCTGATCCTGATGG    |
| E77-G13A     | CACGTACGCAC TTGCCAGCGGCGGATTTCTGTTTCGGCGTGGTTATACAGCTTGAGTGGTGGCACTCTTGCCAGCCTAAGTGTGGGGTGCATCGAATTAGTAGTAGCTGATCCTGATGG   |
| E105-G10A    | CACGTACGCAC TTGCCAGCGGCGGATTTGGCTTACCCTTCAATTCGGCTGTGTTGCCCTAGGTAGGGTTCAGCAGTGATTTTGGTGGGGCATCGAATTAGCAGTAGCTGATCCTGATGG   |
| E2-G8A       | CACGTACGCAC TTGAGCCGACCGAATCTCTGAGTCTTCGGTCGAGAGCCTGCTATTACGATTAGGAGGCGGCTCTCGGCTGGTGGCATCGAATTAGCAGTAGCTGATCCTGATGG       |
| E129-G7      | CACGTACGCATTTCCAGCGGATCGAATTGTATCTCATGAGCGTAGGGAGGTCTATTGTTGGGGGGCAGTGTATGATAGCAGGTGAGCATCGAATCAGCAGT                      |
| E126-G7      | CACGTACGCAC TTGCCAGCGGCGGAACCTTACCCTCATTGGTGCAGTAATAAGAGCAGATGTTGCGTGTTCGGGAACGTAATGACGGTGGCATCGAATCAGCAGT                 |
| E121-G7      | CACGTACGCATTACGAGCCGTACGAGTCTCTCTTAAGGTGTGTGCTCGTATGTCATCTAGTGTGCGCGGGGGGGTGGTTCGAGTGTGGCATCGAATCAGCAGT                    |

**Figure S2. Sequences of specific DNazyme clones isolated from experiment A.** The sequence class (E) and generation (G) in which each clone was found is indicated. In cases where more than one clone was assayed from the same generation and sequence class, a further numerical designation is provided to distinguish between them (C). The PCR amplification efficiency was determined for clones highlighted in yellow.

**E53-G30B** CACGTACGCATTGCCAGCGGCGGAATCGACTCTGGGCGGATCTGGTCAACCGACCAAGGACGGAGGATTTGGGAGGCTAGTTTLAGGTATCGGATCGGTGGTCTGGAGCTGATGA  
**E25-G10B** CACGTACGCTACTCTCAGTGAGGGGAAATCTTCTCCCTGCGGGAACTATCGGGGGCGCAGTGATCAGGGGTGGATATGGGGATGGGTGCATCGTATCATGTAGTTCCCTGGAGCTGATGA  
**E25-G30B** CACGTACGCACCTCCAGTGGGGCGAAATCTTCTCTCTCGGGAAACAGTTGGGGGGCGCGGTGATCAAGGGTGGAAATGGGGATGGGTGCATCGAGTTGGTGGTCTGGAGCTGATGA  
**E52-G30B** CACGTACGCCAGGCGAGGTCGAGGTGGGATCGGATGATGTATTGTAACGGCACTCTCAGTGAGGCGGGTCTCCTCGGTGGTGGGATCGAGTCACTGGTCTGGAGCTGATGA  
**E58-G30B** CACGTACGCATTGTGTCAGCAGGACGGCAGGGGACCATGGGTGGGGCACTCGGGCCGGGACTCGAATCGTCTCGCTGTAGGTCGGTGGTGGCATTGAATCGGGGTCTGGAGCTGATGA  
**E54-G27B** CACGTACGCGGAGGGGACGGAGGGTGGGGGGCGTATTGCACTCTTAGCGAGCCGAAATCTCGGGAGGCTGGGTTTGTGTTTTGTGGGCATCGAATCCGTGGTCTGGAGCTGATGA  
**E60-G30B** CACGTACGCACCTCCAGCGGGACGAGTCTCAGTCAGGAGGCAGCCGGGAGTAGGTTGGAAGGGCTCTGAACACCTGGTTGGTTGGTGCATCGAGTATGGTCTGGAGCTGATGA  
**E56-G30B** CACGTACGCTGGATCGGACCGGAGAGGGAGGATGTGAGTGCCTAACCCACTGCCAGCGGCGGATTTGTCACCCTCGTCTAGAGTTGGCTATCGAATCATGGTCTGGAGCTGATGA  
**E8/9-G27B** CACGTACGCACAGCCAGTGGCTCGAGTCTGCTCTTCGCTGGGATAGGGGTACGAGGCGGGGGCTACTGACGAGTAGGTAGCTTGGGGGCATCGATCGCGGTCTGGAGCTGATGA  
**E51-G30B** CACGTACGCTGGAGGAGACGGCGGCTTGGGGGTGTGGACCACCGGCGCTACGATGGGTTATCTAGGATGGATAGGTTTGGATGGCATCGAATCGGGGTCTGGAGCTGATGA  
**E63-G30B** CACGTACGCATTGTGTCAGCGACAGATTCTTGGCGGGATGCTTACGTTACGCTGGTCAGGAGCTGGAGCGCAGGTTCGGAGGTGGCTGGCATCGAGTTGGTGGTCTGGAGCTGATGA  
**E9-G21B** CACGTACGCACCTGCCAGCGGCACGATTCTTGGGTGTGATGTGATATGGGCTACGAGGCGGGGGCTACTGAAGAGTAGGTAGCTTGGGGTATTGAATCGCGGTCTGGTCTGATGA  
**E8-G13B** CACGTACGCACAGCCAGCGGCTCGAGTCTGCTCTTCGCTGGGATAGGGGTTTATGTTGAAACACTAACCTAAATTTTCGACGGGTGTGGCATCGAATCGCAGTTCTGGAGCTGATGA  
**E8-G21B** CACGTACGCACAGCCAGTGGCTCGAGTCTGCTCTTCGCTGGGATAGGGGTTTATGTTGAAACACTAACCTAAATTTTCGACGGGTGTGGCATCGAATCGCAGTTCTGGAGCTGATGA  
**E2-G18B** CACGTACGCACCTGTGAGCCGACAGAACTCTCTGAGTCTTCGGTCCGAGAGCCTGCTATCCAGCATTAGGAGGCGCGCTCTCGGCTGGTGGCATGAATCATGGTCTGGAGCTGATGA  
**E2-G21B** CACGTACGCATTGTGAGCCGACTCGAATCTCTGAGTCTATGGTCCGAGAGCTTGTCTGTCCAGCATTAGGAGTCCGCTCTCGGCTGGTGGCATGAATCGGGGTCTGGAGCTGATGA  
**E5-G24B** CACGTACGCACCTGTAGTAACACGAGTCACTCTTCGCGAGAGCTGCAGTCACTCGGCTTCGTGAGGGGGTGTAGACCTGTTGGGGGGGCATCGAATCGGGGTCTGGAGCTGATGA  
**E3-G15B** CACGTACGCACCTTAGCAGGGCGAAATCTTCTGCGGAGAGCTGAACCTTAAAGTCTGGACTTAGAGTTCTGTGACTGTGGCCGGCATTGAATCAGTAGTCTGGAGCTGATGA  
**E38-G18B** CACGTACGCAATCTTAGCAAGACGAGTCTCTCTTCTGGCGTTGGGCACATGTTGGGAACACTGCCAGTTTGGTGAATACATGTGGCATCGAATCATGGTCTGGAGCTGATGA  
**E17-G10B** CACGTACGCACCTAATAGCATTACGAATCCGACACAAGACGTTGGAAAAATTTGGAAGTCTGAGGGGCTTTTGTTTGTAGTCTGCTTGGCATCGAATCAGTAGTCTGGAGCTGATGA  
**E4-G13B** CACGTACGCACCTATGAGCCATACGACGTCCTCTCCAGCGCCGCATGAAGCAGAACGTAGGTGAAGGATCCCTTAAAGTGGCTCGGGTGGCATCGAATAGCAGTTCTGGAGCTGATGA  
**E4-G18B** CACGTACGCACCTATGAGCCATACGATGTCCTCTCCAGCGCCGCATGACGAGTACGTAGGTGATAGGATCCCTTAAAGTGGCTCGGGTGGCATCGAATAGCAGTTCTGGAGCTGATGA  
**E36-G15B** CACGTACGCACCTCCAGCGGATCGAAATGTCTCTATCTCCTTGGCCGTTGGAGCCGGGAGGGACAATAGCAGATTTGTATGATGTGCGTGCATCGAATCAGTAGTCTGGAGCTGATGA  
**E1-G15B** CACGTACGCACCTCCAGTGGGGCGAAATTAACCTGAATGATGGTGTCTTGGCTCAGCTTACGCACACGAGAGGGTTTGGTGGTGGGCATCGAATAGCAGTCTGGAGCTGATGA  
**E14-G10B** CACGTACGCACCTGCTAGCAGCCCGAAATTTGCTCTCCCAATATGGGCTTCCGGGGAAGACGGTAATAGGAGAAATGGTGCCTTGTGTTGTATCGAATCAGTAGTCTGGAGCTGATGA  
**E42-G15B** CACGTACGCACCTCCAGCGGATCGAAATCTCGAACCGAGTTAGGCTTGGGTGTGGCGATGAGTTGGCGTAGGCCATGCCTTCCGCTGGTATTGAATCAGTAGTCTGGAGCTGATGA  
**E43-G15B** CACGTACGCACCTATCAGCGATACGAAGACTATGCTCCTATGCTATGCCTGACATTAATGGGGTTAGTCCCCATGTTGGGCGGGTGGCCATCGAATTAGCAGTCTGGAGCTGATGA  
**E18-G15B** CACGTACGCATTTCAGCGGATCGATTCTTTTCCCGTCGAGGTATGACCAGGGAAGAATGGGTGGACACAAATTTGATGGTGTGGGTATCGAATCAGTAGTCTGGAGCTGATGA  
**E28-G10B** CACGTACGCATTGTGTCAGCGACACGAGTCTACGCTCTTTGATCAGACGGATATGCAGTCTTGGAAAGTGAAATCTTTCGACGTTGTGCCATACGAATAGCAGTCTGGAGCTGATGA  
**E23-G13B** CACGTACGCACCTGCCAGCGGCGGATTCAGTGTCCGAGACTAGTTGTTGCCTTCGGCTTAGAAGGACAAAATTTTTCATAGCGTGGGCATCGAATAGCAGTCTGGAGCTGATGA  
**E30-G13B** CACGTACGCACCTGTGTCAGCGACACGAAATCTTCCGTGGTAAAAGGTCTCCGCTTCTGAGTTTAGGTCAATGTGACCGGTTCTCGTTGGGGGCATCGATCAGTAGTCTGGAGCTGATGA  
**E173-G13B** CACGTACGCACCTTTCAGCGAATCGAATTATATCTCAGTGAATAGTACTCCGCCATGGGAACGGGGTGGGGTGAACAGAAGCTTTGGGCATCGATCAGTAGTCTGGAGCTGATGA  
**E46-G10B** CACGTACGCACCTATCAGCGATCGAATTTCTCATAAGAAATGTGTTTACTCCGAGGTAGGTGTATGGATTGTAGATCGCTAGTTCTGTGGCATCGAATCAGTAGTCTGGAGCTGATGA  
**E198-G8B** CACGTACGCACCTCAGCGAGGCGAGTCTCTTACCAGCCTGGTAGGAAGTTATAGGAGGCGATTATAAGTCCGGGGAGTGGCCATGGCATCGAATCAGTAGTCTGGAGCTGATGA

**Figure S3. Sequences of specific DNzyme clones isolated from experiment B.** The specific sequence class (E) and generation (G) in which each clone was found is indicated. The PCR amplification efficiency was determined for clones highlighted in yellow.
